# Supplementary material for: Searching for Promoters to Drive Stable and Long-Term Transgene Expression in Fibroblasts for Syngeneic Mouse Tumor Models
Source: PubMed Central journal article supplement (PMC7504129; doi:10.3390/ijms21176098), 2020-08-24
Supplement: ijms-21-06098-s001.pdf [file ijms-21-06098-s001.pdf]

**Supplementary Figure S1. Evaluation of lentivirus integration.** Analysis of the transgene abundance in stably transduced fibroblasts one or five weeks after transduction. The transcription level of the transgene was under the control of pCMV, pPCNA, or IGFBP2 promoters. The experiments were performed in triplicate for each sample. The height of each box represents the mean average of a sample, while associated error bars represent  $\pm$  s.e.m.

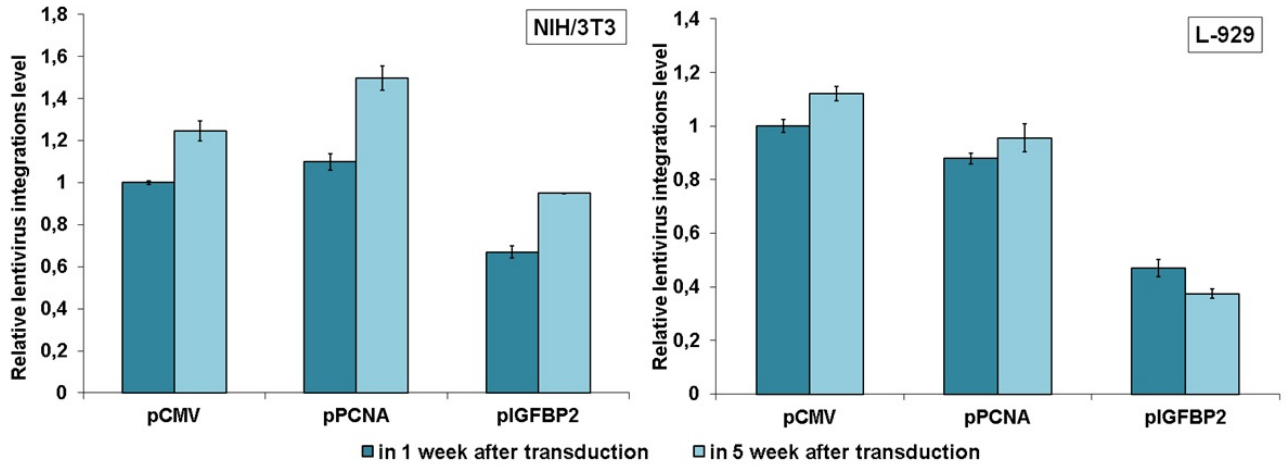

**Nucleotide sequences of the DNA elements used for this study:**

> pCMV (581 bp)

```

taatagtaatcaattacggggtcattagttcatagcccatatatggagttccgcgttacataac
ttacggtaaatggcccgctggctgaccgccaacgacccccgccattgacgtcaataatgac
gtatgttcccatagtaacgccaatagggactttccattgacgtcaatgggtggagtatttacgg
taaactgcccacttggcagtacatcaagtgtatcatatgccaaagtacgccccctattgacgtca
atgacggtaaatggcccgctggcattatgccagtacatgaccttatgggactttcctacttg
gcagtacatctacgtattagtcacgctattaccatgggtgatgcggttttggcagtacatcaat
ggcggtggatagcggtttgactcacggggatttccaagtctccacccattgacgtcaatggga
gtttgttttggcaccaaaatcaacgggactttccaaaatgtcgtacaactccgccccattgac
gcaaatgggcggtaggcgtgtacgggtgggaggtctatataagcagagctggtttagtgaaccgt
cagat

```

> pPCNA (389 bp)

```

tctccacatatgcccgacttgttctgcgccgggttcaggagtcaaagaggcggggagacctg
cgcgacgctgccccgccctgcccgccttctccaatgtatgctctagggggcgggcctcgcg
ggagcatggacacgattggccctaaagtcttccccgcaaggccgtgggctggacagcgtggtga
cgtcgcaacgcggcgcagggtgagagcgcgcgcttgcggacgcggcggcattaaacggttgac
gcgtagcagagtggtcgttcttcttaggtctcagccggtcgtcgcgacgcttcgcccgtcgc

```
